# Supplementary material for: Impact of Delayed Time to Antibiotics in Medical and Surgical Necrotizing Enterocolitis
Source: MDPI journal article supplement (doi:10.3390/children10010160), 2023-01-14
Supplement: s1 [file s1]

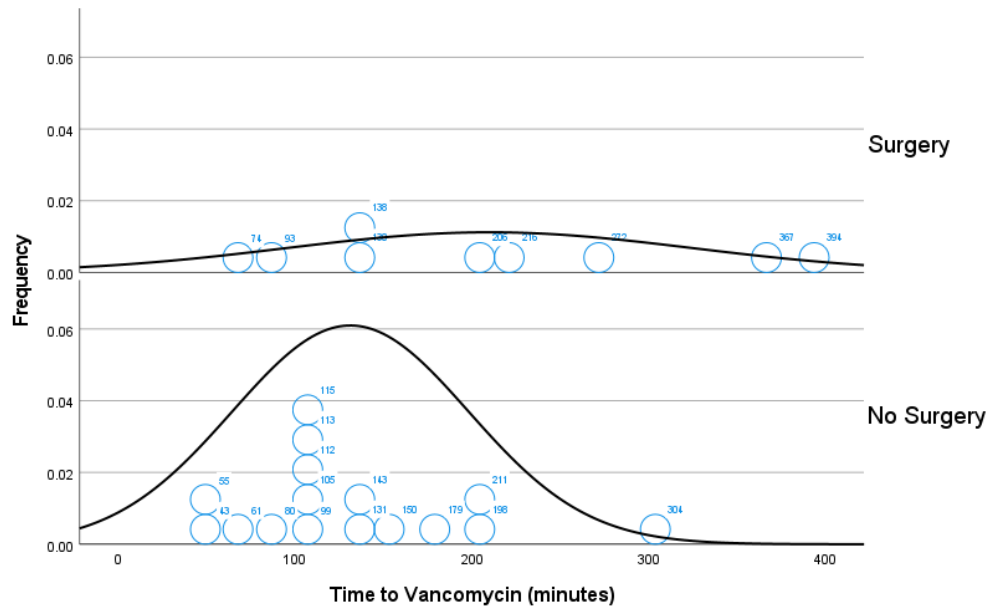

**Figure S1.** Histogram of minutes to vancomycin from order time of each NEC case (infant is blue circle, number=minutes), displayed by outcome group (surgery or no surgery). Outliers from the surgical group 367 and 389 did not receive any other antibiotics before this time. Outlier 304 in non-surgical group received other antibiotics (nafcillin and gentamicin) and had HSV+ cultures. (Plot of Vancomycin Delay in Minutes by Medical or Surgical NEC Group).

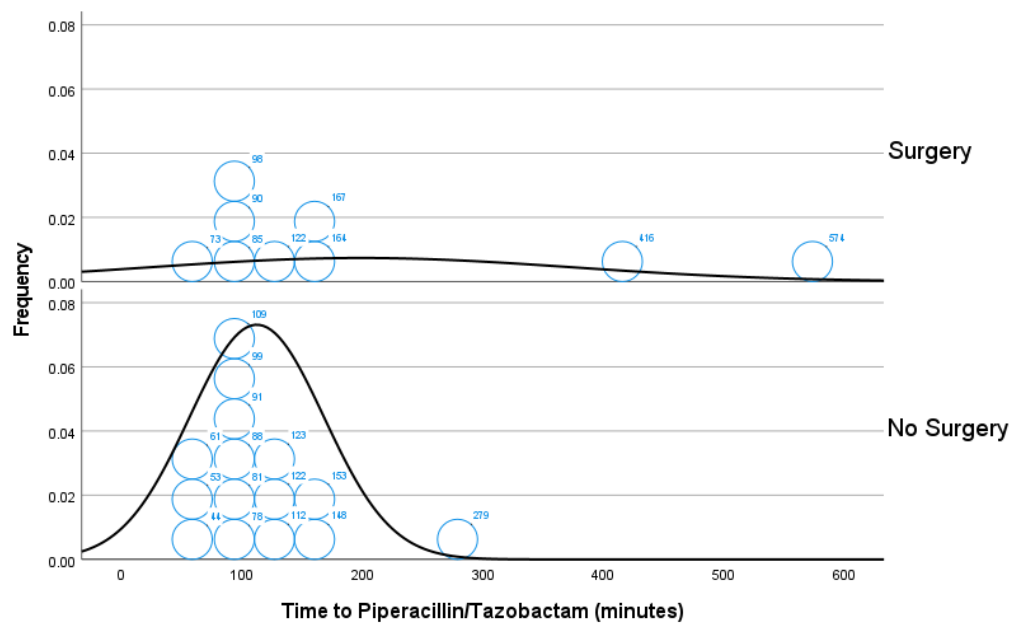

**Figure S2.** Histogram of minutes to piperacillin/tazobactam from order time of each NEC case (infant is blue circle, number=minutes), displayed by outcome group (surgery or no surgery). Outliers in the surgical group 416, and 574 did not receive antibiotics before given pip/taz (excluding vancomycin). Outlier 279 in the non-surgical group received nafcillin and gentamicin. (Plot of Piperacillin/tazobactam Delay in Minutes by Medical or Surgical NEC Group).

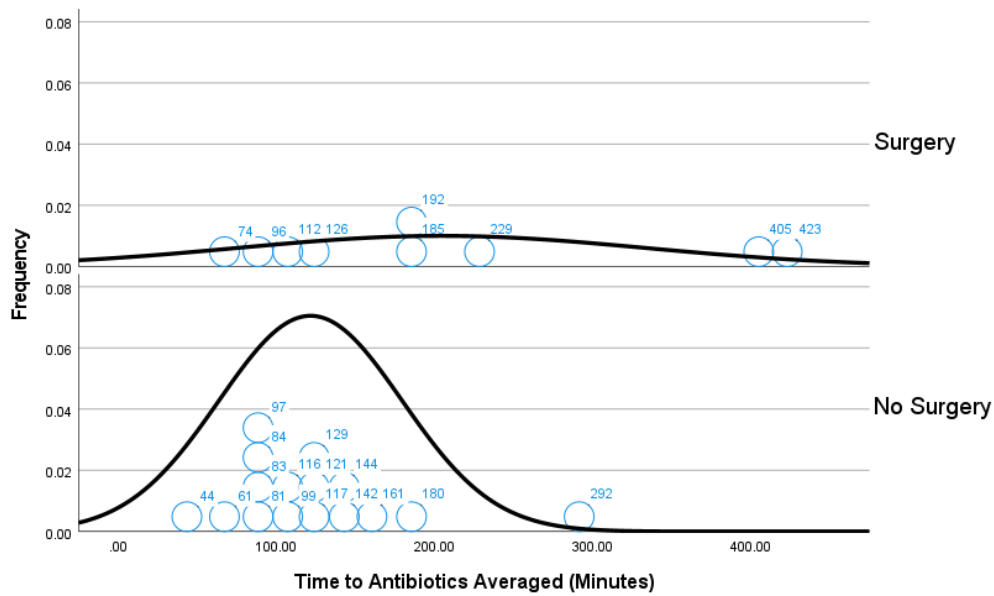

**Figure S3.** Histogram of average minutes to antibiotics (vancomycin and piperacillin/tazobactam) from order time of each NEC case (infant is blue circle, number=minutes), displayed by outcome group (surgery or no surgery). (Plot of Average Antibiotic Delay in Minutes per Infant by Medical or Surgical NEC Group).
